1 **Carbohydrate, glutathione, and polyamine metabolism are central**  
2 **to *Aspergillus flavus* oxidative stress responses over time**

3 **Short Title: *Aspergillus flavus* metabolic responses to oxidative stress**

4  
5 Jake C. Fountain<sup>1,2</sup>, Liming Yang<sup>2,3</sup>, Manish K. Pandey<sup>4</sup>, Prasad Bajaj<sup>4</sup>, Danny Alexander<sup>5</sup>,  
6 Sixue Chen<sup>6</sup>, Robert C. Kemerait<sup>2</sup>, Rajeev K. Varshney<sup>4</sup>, Baozhu Guo<sup>1,\*</sup>

7  
8 <sup>1</sup> USDA-ARS, Crop Protection and Management Research Unit, Tifton, GA 31793, USA;

9 <sup>2</sup> Department of Plant Pathology, University of Georgia, Tifton, GA 31793, USA;

10 <sup>3</sup> Nanjing Forestry University, College of Biology and Environmental Science, Nanjing 210037,  
11 China;

12 <sup>4</sup> International Crop Research Institute for the Semi-Arid Tropics (ICRISAT), Hyderabad,  
13 Telangana 502324, India

14 <sup>5</sup> Metabolon, Inc., Durham, NC 27713, USA;

15 <sup>6</sup> University of Florida, Department of Biology, Genetics Institute, and Plant Molecular &  
16 Cellular Biology Program, Gainesville 32611, FL, USA.

17

18

19

20

21 Author e-mail addresses: J.C. Fountain: [jfount1@uga.edu](mailto:jfount1@uga.edu); L. Yang: [yanglim10@163.com](mailto:yanglim10@163.com); M.  
22 Pandey: [m.pandey@cgiar.org](mailto:m.pandey@cgiar.org); P. Bajaj: [p.bajaj@cgiar.org](mailto:p.bajaj@cgiar.org); D. Alexander:  
23 [dalexander@metabolon.com](mailto:dalexander@metabolon.com); S. Chen: [schen@ufl.edu](mailto:schen@ufl.edu); R.C. Kemerait: [kemerait@uga.edu](mailto:kemerait@uga.edu); R.K.  
24 Varshney: [r.k.varshney@cgiar.org](mailto:r.k.varshney@cgiar.org); B. Guo: [baozhu.guo@ars.usda.gov](mailto:baozhu.guo@ars.usda.gov)

25

26

27 **\*Corresponding Author:**

28 Dr. Baozhu Guo

29 [baozhu.guo@ars.usda.gov](mailto:baozhu.guo@ars.usda.gov)

30

31

32 **Key Words:** *Aspergillus flavus*, aflatoxin, drought stress, oxidative stress, metabolomics

33 **Abstract**

34 The primary and secondary metabolites of fungi are critical for adaptation to environmental  
35 stresses, host pathogenicity, competition with other microbes, and reproductive fitness. Drought-  
36 derived reactive oxygen species (ROS) have been shown to stimulate aflatoxin production and  
37 regulate development in *Aspergillus flavus*, and may function in signaling with host plants. Here,  
38 we have performed global, untargeted metabolomics to better understand the role of aflatoxin  
39 production in oxidative stress responses, and also explore isolate-specific oxidative stress  
40 responses over time. Two field isolates of *A. flavus*, AF13 and NRRL3357, possessing high and  
41 moderate aflatoxin production, respectively, were cultured in medium with and without  
42 supplementation with 15mM H<sub>2</sub>O<sub>2</sub>, and mycelia were collected following 4 and 7 days in culture  
43 for global metabolomics. Overall, 389 compounds were described in the analysis which were  
44 examined for differential accumulation. Significant differences were observed in both isolates in  
45 response to oxidative stress and when comparing sampling time points. The moderate aflatoxin-  
46 producing isolate, NRRL3357, showed extensive stimulation of antioxidant mechanisms and  
47 pathways including polyamines metabolism, glutathione metabolism, TCA cycle, and lipid  
48 metabolism while the highly aflatoxigenic isolate, AF13, showed a less vigorous response to  
49 stress. Carbohydrate pathway levels also imply that carbohydrate repression and starvation may  
50 influence metabolite accumulation at the later timepoint. Higher conidial oxidative stress  
51 tolerance and antioxidant capacity in AF13 compared to NRRL3357, inferred from their  
52 metabolomic profiles and growth curves over time, may be connected to aflatoxin production  
53 capability and aflatoxin-related antioxidant accumulation. The coincidence of several of the  
54 detected metabolites in H<sub>2</sub>O<sub>2</sub>-stressed *A. flavus* and drought-stressed hosts suggests their

55 potential role in the interaction between these organisms and their use as markers/targets to  
56 enhance host resistance through biomarker selection or genetic engineering.

57

## 58 **Author Summary**

59 *Aspergillus flavus* is a fungal pathogen of several important crops including maize and peanut.

60 This pathogen produces carcinogenic mycotoxins known as aflatoxins during infection of plant

61 materials, and is particularly severe under drought stress conditions. This results in significant

62 losses in crop value and poses a threat to food safety and security globally. To combat this,

63 understanding how this fungus responds to environmental stresses related to drought can allow

64 us to identify novel methods of mitigating aflatoxin contamination. Here, we analyzed the

65 accumulation of a broad series of metabolites over time in two isolates of *A. flavus* with differing

66 stress tolerance and aflatoxin production capabilities in response to drought-related oxidative

67 stress. We identified several metabolites and mechanisms in *A. flavus* which allow it to cope with

68 environmental oxidative stress and may influence aflatoxin production and fungal growth. These

69 may serve as potential targets for selection in breeding programs for the development of new

70 cultivars, or for alteration using genetic engineering approaches to mitigate excessive aflatoxin

71 contamination under drought stress.

72

## 73 **Introduction**

74 Abiotic stresses such as drought, heat, and osmotic stress have significant effects on the growth

75 of plant pathogenic fungi, and can hinder their capability of infecting host plants. Drought stress

76 in particular has been shown to have significant effects on both fungal pathogenicity and on host

77 resistance to infection with some degree of specificity. For example, the growth of pathogenic

78 fungi such as *Botrytis cinerea* causing gray mold, and *Oidium neolycopersici* causing powdery  
79 mildew on tomato are reduced or inhibited under drought stress (Achou et al. 2006; Ramegowda  
80 and Senthil-Kumar, 2015). Drought can also influence host metabolic composition and affect  
81 interactions with invading pathogens (Lecompte et al. 2017). The growth of microbes in soil  
82 environments along with their metabolic profiles and development can also be influenced by  
83 drought stress resulting in altered soil ecology and competition among microbes for limiting  
84 resources (Schimel et al. 2007). This shows the importance of metabolite accumulation in fungal  
85 environmental stress responses and pathogenicity, and the potential for abiotic stresses to  
86 regulate host plant immunity.

87       Members of the genus *Aspergillus* have been extensively studied using focused and  
88 untargeted metabolomics studies given their role as saprophytes in soil environments, their  
89 industrial applications, and their potential as human, animal, and plant pathogens. Examination  
90 of the metabolic responses of these fungi have been primarily focused on identifying metabolites  
91 involved in fungal growth and development, and the discovery of novel secondary metabolites  
92 encoded by silent, conserved gene clusters through both genomic prediction, and induced  
93 production using applied stressors or epigenetic modifying compounds (Albright et al. 2015  
94 Bertrand et al. 2014; Brakhage, 2013; Scherlach and Hertweck, 2009). This has led to the  
95 identification of a number of metabolites with potential pharmaceutical applications, and several  
96 involved in the regulation of fungal biology (Amare and Keller, 2014; Calvo et al. 2002; Lopez  
97 et al. 2003). However, application of these techniques to study plant pathogenic species of  
98 *Aspergillus* have been limited.

99       An example of this is *Aspergillus flavus*, a facultative pathogen affecting crops such as  
100 maize and peanut which produces carcinogenic secondary metabolites termed aflatoxins. Annual

101 losses can exceed \$1 billion for US growers, particularly in regions susceptible to drought stress  
102 which has been shown to exacerbate aflatoxin contamination (Hill et al. 1983; Mitchell et al.  
103 2016; Scully et al. 2009). Recent examination of developing maize kernels under drought stress  
104 also showed that accumulation of polyunsaturated fatty acids, and simple sugars along with  
105 decreases in antioxidants such as polyamines occurred in inbred lines sensitive to drought stress  
106 and susceptible to aflatoxin contamination (Yang et al. 2018). The same study also showed a  
107 greater accumulation of reactive oxygen species (ROS), specifically hydrogen peroxide (H<sub>2</sub>O<sub>2</sub>),  
108 in kernels of the drought sensitive line compared to the drought tolerant line under drought  
109 suggesting a correlation between drought tolerance and both ROS accumulation and aflatoxin  
110 contamination. Therefore, investigating this correlation between both matrix composition and  
111 ROS accumulation with aflatoxin production in *A. flavus* may provide insights into mitigating  
112 drought-induced contamination.

113 Matrix composition has been shown to heavily influence both *A. flavus* growth and  
114 aflatoxin production. For example, carbon sources have been found to have a significant effect  
115 on aflatoxin production *in vitro* with simple sugars being able to support aflatoxin production by  
116 *A. flavus* and *A. parasiticus* while other carbon sources such as peptone can inhibit aflatoxin  
117 production in a concentration-dependent manner (Fountain et al. 2015; Yan et al. 2012). Carbon  
118 source and availability has also been shown to influence conidiation in *A. flavus* (Fountain et al.  
119 2015). In addition, the accumulation of lipid compounds such as unsaturated fatty acids, and  
120 oxylipins in host tissues have been demonstrated to influence aflatoxin production (Burow et al.  
121 1997; Gao et al. 2009; Xue et al. 2003; Zerinque et al. 1996).

122 During *in vitro* experiments, the same ROS detected by Yang et al. (2018) to accumulate  
123 in maize kernels under drought have also been shown to stimulate the production of aflatoxin in

124 both *A. flavus* and *A. parasiticus*, and aflatoxin precursors in *A. nidulans* (Grintzalis et al. 2014;  
125 Jayashree and Subramanyam, 2000; Narasaiah et al. 2006; Yin et al. 2013). Variation in  
126 oxidative stress tolerance has also been observed among field and mutant isolates of *A. flavus*  
127 with isolates exhibiting greater aflatoxin production and more later-stage precursor production  
128 tending to tolerate greater levels of oxidative stress compared to less toxigenic or atoxigenic ones  
129 (Fountain et al. 2015; Roze et al. 2015). Such variation in stress tolerance and growth patterns  
130 may also be characteristic of differences in vegetative compatibility groups (VCGs) which have  
131 been shown to vary in host pathogenicity, and competitive ability with other isolates for  
132 environmental nutrients (Mehl and Cotty, 2010, 2013). Also, ROS function in reproductive  
133 signaling in *Aspergillus spp.* with oxidative responses being closely interconnected with the  
134 regulation of reproductive development (Roze et al. 2011). Further, oxidative stress results in  
135 extensive metabolic profile alterations to fungi with regards to primary metabolism and  
136 antioxidant mechanisms following induction by either ROS or ROS-generating compound  
137 application (Sobon et al. 2018; Xu et al. 2018; Zheng et al. 2015).

138 Previous experimentation examining the oxidative stress responses of field isolates of *A.*  
139 *flavus* with different levels of aflatoxin production and stress tolerance by our group have shown  
140 a high degree of variability among isolates in overall strategies to remediate stress at both the  
141 transcript and protein levels (Fountain et al. 2016a, 2016b, 2018). These studies suggested that  
142 highly toxigenic isolates may exhibit earlier, more effective oxidative stress remediation  
143 mechanisms compared to less toxigenic or atoxigenic isolates. Transcripts and proteins involved  
144 in antioxidant protection, carbohydrate metabolism, microbial competitiveness, reproductive  
145 development, and the production of other secondary metabolites such as kojic acid and aflatrem  
146 were among those differentially expressed in response to oxidative stress. Differences in isolate-

147 specific oxidative stress responses were also proposed to be due to resource allocation and the  
148 regulation of primary and secondary metabolic pathways to mitigate oxidative damage. While  
149 these studies provided an extensive overview of transcript and protein-level responses to  
150 oxidative stress, they are not fully capable of characterizing changes in final biochemical product  
151 levels, and resource allocation over time. Therefore, the objectives of this study were: 1) to  
152 identify differentially accumulating metabolites over time to explain isolate-to-isolate variability  
153 in oxidative stress responses; 2) to identify metabolic responses that begin to explain the  
154 relationship between oxidative stress and exacerbated aflatoxin production; and 3) to identify the  
155 metabolites that correspond to host drought responses with potential use in improving host  
156 resistance through selection or biotechnology. To accomplish this, we performed a global,  
157 untargeted metabolomics analysis of two field isolates of *A. flavus* with different levels of  
158 aflatoxin production and their response to oxidative stress over time.

159

## 160 **Results**

### 161 **Effects of oxidative stress on isolate growth rates**

162 Two isolates of *A. flavus*, AF13 and NRRL3357, which were previously observed to possess  
163 relatively high (up to 35mM H<sub>2</sub>O<sub>2</sub>) and moderate (up to 20mM H<sub>2</sub>O<sub>2</sub>) levels of oxidative stress  
164 tolerance and aflatoxin production, respectively (Fountain et al. 2015), were selected for this  
165 study. The isolate AF13 is a high aflatoxin producing L-strain (sclerotia size >400µm) with a  
166 MAT1-2 mating type belonging to the YV-13 vegetative compatibility group (VCG) and  
167 relatively high tolerance to oxidative stress (Cotty, 1989; Ehrlich et al. 2007; Fountain et al.  
168 2015). The isolate NRRL3357 is a moderately high aflatoxin producing L-strain with a MAT 1-1  
169 mating type with no currently defined VCG, and moderate tolerance to oxidative stress (Chang et

170 al. 2012; Fountain et al. 2015). These isolates were examined for conidial oxidative stress  
171 tolerance and the effect of oxidative stress on growth rates. Increasing levels of stress caused  
172 significant delays in the initial detection ( $T_i$ ) of isolate growth for both isolates, but to a greater  
173 extent in NRRL3357 compared to AF13 at both inoculum levels (Figure 1, Table S1). For AF13,  
174 significant growth delays were observed beginning at 10mM  $H_2O_2$  and increasing up to 25mM  
175 where growth was completely suppressed at 20,000 conidia/mL (Figure 1A) but not at 80,000  
176 conidia/mL (Figure 1C). However, growth was completely inhibited at 30mM  $H_2O_2$  even at the  
177 higher inoculum concentration (Table S1). For NRRL3357, significant delays in growth were  
178 also observed at 10mM  $H_2O_2$  while 15mM was completely inhibitory of growth at 20,000  
179 conidia/mL (Figure 1B) but not at 80,000 conidia/mL (Figure 1D). Growth was also completely  
180 inhibited at 20mM  $H_2O_2$  at the higher inoculum concentration (Table S1). These inhibitory  
181 concentrations of  $H_2O_2$  observed for each isolate were 5 – 10mM less than observed when the  
182 isolates were cultured in  $H_2O_2$  amended YES medium in Erlenmeyer flasks with cotton plugs  
183 (Fountain et al. 2015).

184

### 185 **Differential metabolic alterations in response to oxidative stress over time**

186 Two field isolates of *A. flavus* were selected for global, untargeted metabolomics analysis using  
187 an UPLC-MS/MS approach to examine their responses to drought-related,  $H_2O_2$ -derived  
188 oxidative stress over time. This metabolomics analysis identified 389 distinct metabolites.  
189 Functional classification for the detected metabolites was performed based on the Kyoto  
190 Encyclopedia of Genes and Genomes (KEGG) database (Kanehisa and Goto, 2000). These  
191 metabolites were grouped into nine super pathways with a majority of metabolites being



192 classified as either amino acids (163), lipids (84), nucleotides (54), or carbohydrates (43). These  
193 super pathways were further divided into 47 sub-pathways which are described in Table S2.

194 Welch's two-sample t-test was used for differential accumulation analyses to identify  
195 metabolites significantly different between oxidative stress treatments, between isolates, or over  
196 time (Table 1). Data normalization using DNA or protein content was found to introduce  
197 possible skewing in time and isolate effects on metabolite accumulation. Therefore sample mass  
198 per unit volume of extraction solvent was used for normalization and these data were used for  
199 analysis and interpretation. Both protein and non-protein normalized datasets, and raw data are  
200 included in Supplemental File 1. When comparing between stress treatments, AF13 showed 111  
201 and 47 metabolites which differentially accumulated at 4 and 7 DAI, respectively. Of these, 27  
202 and 64 metabolites were significantly increased and decreased, respectively, in abundance at 4  
203 DAI, and 34 and 13 were increased and decreased in abundance, respectively, at 7 DAI. For  
204 NRRL3357, 223 and 90 metabolites were differentially accumulated at 4 and 7 DAI,  
205 respectively, in response to stress. Of these, 90 and 133 were significantly increased and  
206 decreased, respectively, at 4 DAI, and 65 and 25 were increased and decreased in abundance,  
207 respectively, at 7 DAI. Time was a highly significant influence on metabolite accumulation with  
208 AF13 showing 257 metabolites with significant differences in abundance between 4 and 7 DAI  
209 without H<sub>2</sub>O<sub>2</sub> treatment and 268 with H<sub>2</sub>O<sub>2</sub> treatment. In NRRL3357, this was also apparent with  
210 243 and 261 metabolites being significantly altered in abundance between 4 and 7 DAI either  
211 with or without H<sub>2</sub>O<sub>2</sub> treatment, respectively. Comparisons between the isolates are more likely  
212 to reflect genetic differences rather than stress response, but more stark differences in numbers of  
213 differentially accumulating metabolites could be observed between AF13 and NRRL3357 at 4  
214 DAI regardless of H<sub>2</sub>O<sub>2</sub> treatment.

215           These differences in metabolite accumulation were also observed in principal  
216 components analyses (Figure 2). The first component was dominated primarily by time effects  
217 reflecting significant differences between the 4 and 7 DAI time points. Significant stress effects  
218 could also be observed between the isolates with more stark differences observed at 4 DAI.  
219 Samples from 7 DAI did not segregate into distinct clusters as seen in samples from 4 DAI. A  
220 higher degree of variability between biological replicates was also observed in the 7 DAI  
221 samples compared to 4 DAI.

222

### 223 **Carbohydrate metabolic responses to oxidative stress**

224 Significant variation in carbohydrate metabolite accumulation was observed in response to  
225 oxidative stress in both AF13 and NRRL3357. AF13 showed significant changes in glycolytic  
226 compounds glucose and pyruvate with significant decreases ( $p < 0.05$ ) in both compounds at 4  
227 DAI in response to stress with glucose and fructose levels showing marginally significant  
228 increases at 7 DAI ( $p < 0.10$ ; Figure 3). NRRL3357 showed significant decreases in both glucose  
229 and pyruvate at 4 DAI in response to stress with a significant decrease in pyruvate also detected  
230 at 7 DAI. Fructose levels in NRRL3357 were also increased at both time points in response to  
231 stress (Figure 3). Time effects showed that pyruvate accumulated in NRRL3357 over time  
232 regardless of  $H_2O_2$  treatment, and glucose and fructose were significantly decreased over time  
233 with reductions in glucose only seen in non-stressed samples (Supplemental File 1).

234           Intermediates in the tricarboxylic acid (TCA) cycle were also significantly affected by  
235 oxidative stress. NRRL3357 showed significant reductions, particularly at 4 DAI, in citrate,  
236 isocitrate, alpha-ketoglutarate, fumarate, and malate in response to oxidative stress (Figure 3).  
237 Conversely, AF13 showed no significant changes in TCA intermediate levels in response to

238 oxidative stress with the exception of a significant increase in succinate at 4 DAI. These  
239 compounds were, however, seen to generally accumulate over time in the stressed samples when  
240 comparing time points (Supplemental File 1).

241 In addition to these pathways, AF13 and NRRL3357 showed significant reductions in  
242 trehalose, arabitol, and xylitol in response to oxidative stress at 4 DAI with less significant  
243 decreases or no significant differences being observed in response to stress at 7 DAI  
244 (Supplemental File 1). Additional metabolic products of arabinose and xylinose, arabinate and  
245 xylicate were increased in accumulation in response to stress in both isolates and time points  
246 (Supplemental File 1). Increases in amino sugars were also observed in both isolates, particularly  
247 at 4 DAI in response to stress (Supplemental File 1).

248

#### 249 **Amino acid metabolic responses to oxidative stress**

250 Significant changes in the accumulation of amino acids and their derivatives were observed in  
251 both isolates in response to oxidative stress over time. Changes in primary amino acids were  
252 proportional to changes in their precursors with more significant changes occurring in  
253 NRRL3357 compared to AF13 (Figure 3; Supplemental File 1). In particular, changes in  
254 aromatic amino acid precursors in the tryptophan and histidine pathways were observed in  
255 NRRL3357 in response to oxidative stress although the levels of tryptophan and histidine were  
256 unchanged or reduced, respectively, in the same conditions (Supplemental File 1). In addition,  
257 the tryptophan derivative kynurenine was increased in NRRL3357 at both time points in  
258 response to oxidative stress, but not in AF13 (Supplemental File 1). Proline levels were also  
259 increased in NRRL3357 at 7 DAI in response to stress (Supplemental File 1). Among the amino

260 acid derivatives, those involved in glutathione, polyamine, and sulfur metabolism were among  
261 the most differentially accumulating in response to oxidative stress.

262         Glutathione metabolism was significantly regulated in both isolates but to a greater extent  
263 in NRRL3357 compared to AF13 (Figure 3). Significant increases in 5-oxoproline, ophtalmate,  
264 oxidized glutathione (GSSH), and cysteine-glutathione disulfide were observed in NRRL3357 in  
265 response to increasing stress (Figure 3). AF13 showed marginally significant ( $p < 0.10$ ) increases  
266 in accumulation of only 5-oxoproline and ophtalmate were see at 7 DAI in response to stress.  
267 Direct comparison of levels between these isolates showed that AF13 accumulated significantly  
268 greater levels of GSSH and cysteine-glutathione disulfide at 4 DAI compared to NRRL3357 in  
269 the absence of oxidative stress, and equivalent and greater levels, respectively, of each when  
270 under oxidative stress (Supplemental File 1). When comparing time point measurements, 5-  
271 oxoproline, ophtalmate, and GSSG showed significant reductions in accumulation in both  
272 isolates and treatments (Supplemental File 1). Significant changes were also found among the  
273 gamma-glutamyl amino acids which were significantly reduced in AF13 at 4 DAI in response to  
274 stress, but tended to be either unchanged or increased in accumulation in NRRL3357 in response  
275 to stress (Figure 3).

276         In addition to glutathione, other sulfur-containing amino acids and their metabolites were  
277 significantly regulated in response to oxidative stress (Figure 4). Significant reductions in  
278 methionine levels were observed in both isolates at 4 DAI in response to oxidative stress. S-  
279 adenosylmethionine (SAM), an important signaling compound, was also significantly regulated  
280 in response to oxidative stress showing increasing accumulation at 7 DAI in both isolates, and a  
281 significant decrease at 4 DAI in NRRL3357 (Figure 4). 5-methylthioadenesine (MTA) also  
282 exhibited a similar pattern of accumulation to SAM. In addition to methionine derivatives,

283 cysteine also serves as a precursor to the antioxidant compound taurine which was significantly  
284 increased in both isolates at 4 DAI and in AF13 at 7 DAI in response to oxidative stress. A  
285 taurine precursor, 3-sulfo-L-alanine, was also significantly increased in both isolates and time  
286 points in response to oxidative stress (Figure 4).

287 Polyamine metabolites were also significantly regulated in response to oxidative stress in  
288 both isolates. Ornithine showed significant reduction in AF13 at 4DAI while putresine showed  
289 the same in NRRL3357 in response to oxidative stress while the immediate precursor to  
290 ornithine, N-alpha-acetylornithine, was increased in both isolates at 4 DAI (Figure 4;  
291 Supplemental File 1). These compounds are precursors to both spermidine and N-acetylputresine  
292 which showed significant increases in both isolates in response to oxidative stress. N-  
293 acetylputresine is a part of butanoate metabolism and used for the biosynthesis of gamma-  
294 aminobutanoate (GABA) which showed marginally significant changes in abundance in response  
295 to oxidative stress (Figure 4).

296

### 297 **Fatty acid metabolic responses to oxidative stress**

298 Several fatty acids and their derivatives were also significantly regulated in response to H<sub>2</sub>O<sub>2</sub>-  
299 stress over time. Significant regulation of saturated and mono- and poly-unsaturated fatty acid  
300 accumulation were primarily observed in NRRL3357 in response to stress (Figure 5). Significant  
301 increases in the saturated fatty acids pentadecanoic acid (15:0) and heptadecanoic acid (17:0)  
302 were seen at 7 and 4 DAI, respectively, in NRRL3357 in response to stress (Figure 5). Similarly,  
303 significant increases in several unsaturated fatty acids were also seen in NRRL3357 (Figure 5).  
304 While no significant regulation of these fatty acids was seen in AF13 in response to oxidative

305 stress within each time point, significant depletion of these fatty acids was observed in both  
306 isolates over time with or without the presence of oxidative stress (Supplemental File 1).

307 Other fatty acid derivatives were also found to differentially accumulate in the isolates  
308 under oxidative stress. In AF13, betaine, an ethanolamine derivative, was significantly decreased  
309 under oxidative stress at 4 DAI (Figure 5). Several phospholipids such as  
310 glycerophosphoglycerol were also found to be differentially accumulating in response to  
311 oxidative stress in both isolates (Supplemental File 1). Ergosterol levels were found to be  
312 significantly decreased under stress in AF13 at 7 DAI and in NRRL3357 at 4 DAI. There was no  
313 significant change in ergosterol levels over time in either treatment, but AF13 accumulated  
314 significantly more than NRRL3357 at 4 DAI in both treatments, while at 7 DAI AF13 was found  
315 to have more only in the non-stressed control (Supplemental File 1).

316

### 317 **Other compounds regulated in response to oxidative stress**

318 In addition to amino acids, carbohydrates, and lipids, other classes of compounds were found to  
319 differentially accumulate in response to increasing oxidative stress over time in both isolates.

320 Among cofactors and electron carriers, carnitine and related metabolites were significantly  
321 reduced in both isolates at 4 DAI in response to stress, but showed significant increases over  
322 time under stress and was present in higher concentrations in AF13 compared to NRRL3357  
323 (Supplemental File 1). Several B vitamins with potential antioxidant activity were also regulated  
324 in response to stress including thiamin (B1), riboflavin (B2), and pyridoxine (B6) (Supplemental  
325 File 1). Several nucleotide derivatives were also differentially accumulated in response to stress  
326 such as adenosine 5'-monophosphate (AMP) which was significantly increased in AF13 at 4  
327 DAI in response to stress, but was significantly depleted in both isolates and treatments over time

328 (Supplemental File 1). Terpenoid and isoterpenoid precursors were also found to differentially  
329 accumulate under stress with mevalonate along with its immediate precursor, 3-hydroxy-3-  
330 methylglutarate, and its lactone form, mevalonolactone, showing significant increases in  
331 response to stress in AF13 at 7 DAI and in NRRL3357 at 4 and 7 DAI (Supplemental File 1).

332

### 333 **Discussion**

334 Drought stress is one of the primary factors contributing to the exacerbation of pre-harvest  
335 aflatoxin contamination in the field. Drought stress has been shown to significantly alter the  
336 metabolic composition of maize kernels during earlier stages of development resulting in  
337 increased levels of free simple sugars, oxylipins, free fatty acids, and signaling compounds  
338 including ROS including H<sub>2</sub>O<sub>2</sub>, superoxide (O<sub>2</sub><sup>-</sup>), and hydroxyl ions (OH<sup>-</sup>) (Yang et al. 2015,  
339 2018). These ROS have also been found to stimulate and be required for aflatoxin production  
340 (Jayashree and Subramanyam, 2000). These observations served as the impetus to investigate  
341 responses of *A. flavus* isolates with varying levels of aflatoxin production to drought-related  
342 oxidative stress and the metabolite level over time.

343 Aflatoxin production capability has been previously correlated with *A. flavus* isolate  
344 oxidative stress tolerance (Fountain et al. 2015; Roze et al. 2015). When examining the growth  
345 rates and behavior of *A. flavus* isolates under oxidative stress AF13, a highly toxigenic isolate,  
346 was found to exhibit higher levels of oxidative stress tolerance and growth under stress compared  
347 to NRRL3357, a moderately high toxigenic isolate (Figure 1). Aflatoxin production and the  
348 reactions in the biosynthetic pathway are suspected to result in increased conidial oxidative stress  
349 tolerance due to stimulating additional antioxidant enzyme production, or through the  
350 consumption of ROS during production (Fountain et al. 2016a; Roze et al. 2015). Given this,

351 conidial antioxidant enzyme activity may have contributed here. To further examine this, growth  
352 curve analyses was performed with different inoculum concentrations, and showed that growth  
353 for both isolates occurred at elevated H<sub>2</sub>O<sub>2</sub> levels when the inoculum was increased from 20,000  
354 conidia/mL as described by Meletiadiis et al. (2001) to 80,000 conidia/mL used here as inoculum  
355 for cultures used for metabolomics analysis. Interestingly, even with the increased conidia  
356 concentration, observed stress tolerance remained approximately 5 mM less than the maximum  
357 observed in the previous study. While this may be an artifact of performing the assay in a sealed  
358 microplate with potentially limited oxygen availability, the overall trend was consistent with  
359 previous observations of each isolate's tolerance to oxidative stress (Clevstrom et al. 1983;  
360 Fountain et al. 2015; Jayashree and Subramanyam, 2000).

361         When examining overall metabolite accumulation patterns, NRRL3357 displayed  
362 approximately double the number of differentially accumulating metabolites compared to AF13  
363 in response to oxidative stress with both isolates exhibiting greater numbers at 4DAI compared  
364 to 7 DAI (Table 1). This pattern mirrors observed numbers and functional classifications of  
365 differentially expressed transcripts and proteins for these isolates in response to similar levels of  
366 oxidative stress in our previous transcriptome and proteome studies (Fountain et al. 2016a,  
367 2016b, 2018). Here, significant differences in metabolite accumulation were detected within and  
368 between time points in both isolates, and sampling time was one of the major grouping factors in  
369 the PCA analysis (Table 1; Figures 2 and S1). These time course influences may be due to  
370 differences in isolate growth patterns and, presumably, timing and vigor of oxidative stress  
371 remediation mechanisms. As indicated by the growth curve analysis (Figure 1; Table S1), earlier  
372 initiation of growth in AF13 compared to NRRL3357 may be the result of earlier, more vigorous  
373 lag phase or conidial oxidative stress remediation processes. Therefore, sampling at 4 DAI for



374 both isolates would describe actively growing and responding tissues while sampling at 7 DAI  
375 would describe stationary state responses in AF13 having already remediated the majority of  
376 oxidative stress while NRRL3357 would still be actively growing and responding to stress.

377         Examining the isolate-specific responses to oxidative stress, there were significant  
378 differences in carbohydrate accumulation. Both glycolysis and TCA cycle intermediates were  
379 significantly altered in accumulation in response to oxidative stress in these isolates, but to  
380 differing degrees. NRRL3357 displayed increased demand for TCA intermediates showing  
381 significant decreases in most quantified metabolites in the cycle while AF13 showed no  
382 significant differences (Figure 3). These compounds have been shown to provide some  
383 antioxidant benefit when supplemented to cultured neuronal cells (Sawa et al. 2017), though a  
384 more likely explanation is the use of these compounds in the synthesis of amino acids and/or  
385 their derivatives involved in oxidative stress remediation. Increases in glucose and fructose under  
386 stress in both isolates may also be reflective of higher levels of metabolic demand for simple  
387 sugars, and the beginnings of carbon starvation leading to gluconeogenesis (Dijkema et al. 1985;  
388 Lima et al. 2014), particularly at 7 DAI (Figure 3).

389         When examining time course effects, the accumulation of these compounds in stressed  
390 samples may also be indicative on increased energy demand and the need to maintain redox  
391 homeostasis through the generation of reduced coenzymes for oxidative phosphorylation such as  
392 NADH and NADPH (Kapoor et al. 2015). Significant reductions in their accumulation in  
393 NRRL3357 under stress (Figure 3) could, therefore, partially explain the reduced growth rate,  
394 and observed ongoing stress responses compared to AF13. Also of interest, the pentose  
395 phosphate pathway has been shown to be involved in oxidative stress responses in yeast, and  
396 amino sugars such as ribonate are also involved in the generation of reduced coenzymes used for

397 redox homeostasis (Campbell et al. 2016; Juhnke et al. 1996). These reduced coenzymes,  
398 particularly NADPH, are also critical for the activity of polyketide synthases which may also  
399 impact aflatoxin production levels under oxidative stress (Huang et al. 2009; Kletzien et al. 1994;  
400 Shih and Marth, 1974).

401 Changes in amino acid metabolite levels appeared to form the basis of a majority of the  
402 oxidative stress remediation processes employed by these isolates constituting the bulk of  
403 directly antioxidant compounds and mechanisms. Amino acids such as proline have been  
404 previously shown to be involved in osmotic, drought, and oxidative stress tolerance in fungi and  
405 plants and were increased in abundance in NRRL3357 (Chen and Dickman, 2005; Szabados and  
406 Savoure, 2009). Also in NRRL3357, the tryptophan derivative kynurenine was increased and  
407 may also contribute to stress remediation. Disruption of kynurenine 3-monooxygenase, a central  
408 enzyme in kynurenine metabolism, in *Botrytis cinerea* has been shown to increase tolerance to  
409 H<sub>2</sub>O<sub>2</sub>-derived oxidative stress and host pathogenicity while negatively affecting growth and  
410 development (Zhang et al. 2018).

411 Glutathione pathway components were among the most significantly altered in response  
412 to oxidative stress in both isolates, though to a greater extent in NRRL3357 which can be seen in  
413 the higher accumulation of oxidized glutathione, 5-oxoproline, and ophthalmate in NRRL3357  
414 under stress which were not seen in AF13 (Figure 3). This pathway in conjunction with enzymes  
415 such as catalases and thioredoxin reductases and peroxidases serve as the primary means of  
416 redox homeostasis and oxidative stress alleviation for eukaryotes (Breitenbach et al. 2015).  
417 Glutathione metabolism has been previously linked to both development and aflatoxin  
418 production in *Aspergillus spp.* Huang et al. (2009) showed that treatment of *A. flavus* with an  
419 ethylene-producing compound resulted in increases in GSH/GSSH ratios, oxidative stress

420 remediation, and significant reductions in aflatoxin biosynthetic gene expression and aflatoxin  
421 production. Reduced glutathione accumulation has also been associated with asexual and sexual  
422 development in *A. nidulans* thioredoxin A (*AnTrxA*) mutants with applied GSH resulting in  
423 restored conidiation and early induction of cleistothecia formation following long-term, low  
424 concentration application (Thon et al. 2007). Given this relationship between glutathione,  
425 development, and mycotoxin production, this mechanism may be lending to distinctive growth  
426 patterns and aflatoxin production levels in these isolates which represent diverse VCGs and  
427 mating types and warrants further investigation (Horn, 2007; Mehl and Cotty, 2010, 2013).

428         Sulfur-containing amino acids such as cysteine and methionine, and their derivatives  
429 were also differentially accumulated in response to oxidative stress (Figure 4). These compounds  
430 have antioxidant benefits, and also function in important signaling capacities. Taurine, an  
431 antioxidant compound (Jong et al. 2012), was shown to accumulate in both isolates under stress  
432 along with its immediate precursor 3-sulfo-L-alanine which may supplement other antioxidant  
433 pathways (Figure 4). The detected signaling compounds, SAM and MTA, are closely tied to  
434 polyamine biosynthesis which was also significantly regulated by oxidative stress. Polyamines  
435 such as putresine and spermidine differentially accumulated in this experiment (Figure 4), and  
436 have been found to function in oxidative stress responses either by scavenging ROS, inhibiting  
437 ROS-generating enzymes, or functioning in signal transduction to promote antioxidant  
438 mechanisms (Valdes-Santiago and Ruiz-Herrera, 2014). S-adenosylmethionine is required for  
439 the production of polyamines and MTA is produced from decarboxylated SAM by spermidine  
440 synthase and spermine synthase with accumulating MTA being able to inhibit these enzymes to  
441 prevent the generation of H<sub>2</sub>O<sub>2</sub>-derived oxidative stress due to polyamine back-conversion  
442 (Avila et al. 2004). Therefore, polyamine metabolism along with glutathione metabolism form a

443 coordinated basis for regulating cellular redox potential in *A. flavus* in response to oxidative  
444 stress and may assist in coordination of both reproductive development and mycotoxin  
445 production.

446 Fatty acids were also significantly altered in accumulation in response to oxidative stress.  
447 This is particularly true for mono- and poly-unsaturated fatty acids which tended to be increased  
448 in abundance in NRRL3357 in response to stress, but not in AF13 (Figure 5). Unsaturated fatty  
449 acids have been found to be suitable substrates for aflatoxin production by *A. flavus* and *A.*  
450 *parasiticus*, and their byproducts have been shown to regulate aflatoxin production and  
451 development (Fanelli and Fabbri, 1989; Tsitsigiannis and Keller, 2007). For example, linoleic  
452 acid derivatives known as Psi factors have been shown to regulate both asexual and sexual  
453 sporulation in *A. flavus* and *A. nidulans* (Calvo et al. 1999), and oxylipins function in signaling  
454 for development, mycotoxin production, and host interactions (Affeldt et al. 2012; Fischer and  
455 Keller, 2016; Gao et al. 2009). In addition to signaling, free fatty acids also serve as important  
456 sources of energy, and can be catabolized to produce other macromolecules. Here, a majority of  
457 unsaturated lipids were depleted over time in control and stressed conditions in both isolates  
458 likely to provide energy and components for repairing and responding to oxidative stress  
459 (Supplemental File 1). These fatty acids are also important for maintaining membrane integrity  
460 and fluidity under environmental stress conditions. For example, dienoic fatty acids have been  
461 shown to function in preserving membrane fluidity in yeast under freezing and salt stresses  
462 (Rodriguez-Vargas et al. 2007).

463 Along with these major classes of metabolites, several cofactors and secondary  
464 metabolites were also differentially accumulated in response to stress (Supplemental File 1). Of  
465 particular interest were mevalonate and related terpenoid compounds which were increased in

466 both isolates in response to oxidative stress. These compounds are precursors to some isoprenoid  
467 mycotoxins such as aflatoxin whose biosynthetic genes have been found to be upregulated in  
468 response to oxidative stress in these isolates (Fountain et al. 2016a, 2016b). In addition,  
469 mevalonate and its derivatives have been shown to link the biosynthetic pathways for ergosterol  
470 and ornithine-derived siderophores, and interruption of this link results in reduced tolerance to  
471 oxidative stress, siderophore production, and virulence in *A. fumigatus* (Yasmin et al. 2011).

472           These compounds differentially accumulating in these isolates of *A. flavus* mirror  
473 those observed in other *Aspergillus spp.* such as *A. oryzae* (Singh et al. 2018) and provide  
474 potential insights into putative approaches to enhance host resistance under drought stress. We  
475 hypothesized that excessive ROS generated in drought sensitive host plants during drought stress  
476 may contribute to enhancing susceptibility to aflatoxin contamination (Fountain et al. 2014;  
477 2015). In addition, the metabolic pathways employed by *A. flavus* in remediating oxidative stress  
478 seen in this study parallel those employed by host plants such as maize in countering drought  
479 stress in developing kernel tissues (Yang et al. 2018). Given this relationship, the manipulation  
480 of host tissue composition may be a viable approach to improve aflatoxin contamination  
481 resistance through two possible methodologies. The first method is biomarker selection  
482 employed in breeding programs (Fernandez et al. 2016). For aflatoxin mitigation, enhanced  
483 accumulation of antioxidant compounds in host plant tissues corresponding to those observed in  
484 *A. flavus* such as glutathione pathway components, polyamines, or simple sugar content could be  
485 selected for in conventional and molecular breeding programs. The second method is genetic  
486 engineering including both genome editing and transgenic approaches to manipulate the  
487 expression of host plant enzymes to modify kernel composition to reduce stress on infecting *A.*  
488 *flavus* under drought. These technologies could also be used to enhance host plant antioxidant

489 potential through increased antioxidant enzyme expression, antioxidant compound production, or  
490 aflatoxin inhibitor production. This would also have the added potential benefit of reduced  
491 drought-related kernel abortion and filling reduction due to oxidative damage.

492

## 493 **Materials and Methods**

### 494 **Isolate collection**

495 The isolates used in this study were obtained as follows. AF13 was requested from Dr. Kenneth  
496 Damann, Department of Plant Pathology and Crop Physiology, Louisiana State University,  
497 Baton Rouge, LA. NRRL3357 was requested from the USDA National Culture Repository,  
498 Peoria, IL. All isolates were shipped on PDA and transferred to V8 agar as previously described  
499 (Fountain et al. 2018). Agar plugs containing fresh conidia were taken along the growing edge of  
500 the colonies and stored in sterile water and 20% (v/v) glycerol at 4 and -20°C, respectively, until  
501 used.

502

### 503 **Culture conditions and tissue collection**

504 Isolate conidia suspensions were used to inoculate V8 agar plates, and were incubated at 37°C  
505 for 5 days. Conidia were then harvested using sterile 0.1% (v/v) Tween 20 and a sterile loop to  
506 make a fresh conidia suspension ( $\sim 2.0 \times 10^7$  conidia/mL) for use as inoculum. For each isolate,  
507 100  $\mu$ L of conidial suspension was then used to inoculate stationary liquid cultures of 50 mL  
508 yeast extract-sucrose medium (YES; 2% yeast extract, 1% sucrose) in 125mL Erlenmeyer flasks  
509 amended with H<sub>2</sub>O<sub>2</sub> (3% stabilized solution) to a final concentration of either 0 or 15mM and a  
510 final conidia concentration of  $\sim 8.0 \times 10^4$  conidia/mL. The flasks were plugged with sterile cotton  
511 and incubated at 30°C in the dark. Mycelial mats were then harvested for each isolate and H<sub>2</sub>O<sub>2</sub>

512 treatment at 4 and 7 days after inoculation (DAI). Five repeat cultures representing five  
513 biological replicates were harvested for each isolate, treatment, and time point. A detailed  
514 description of the experiment design can be found in Figure S1. Harvested mycelia mats were  
515 immediately flash frozen in liquid nitrogen and ground into a fine powder using sterile, chilled  
516 mortar and pestles. The ground tissue (~1g) was then transferred to a sterile 2.0mL  
517 microcentrifuge tube and stored at -80°C until use in metabolomics analysis.

518

### 519 **Metabolomic profiling**

520 Collected and ground mycelia tissues were used for global, unbiased metabolomics by  
521 Metabolon (Morrisville, NC, USA) as described by Yang et al. (2018) and Lin et al. (2017).  
522 Briefly, 50 mg of tissue from each sample were prepared using an automated MicroLab STAR  
523 system (Hamilton, Reno, NV, USA) during which QC standards were added for downstream  
524 normalization. Metabolites and proteins were extracted in methanol in a GenoGrinder 2000  
525 (Glen Mills, Clifton, NJ, USA) followed by centrifugation for metabolite isolation and protein  
526 separation. Each extract was then divided into 5 fractions and used for reverse phase (RP)/ultra-  
527 performance liquid chromatography (UPLC)-tandem mass spectrometry (MS/MS) with positive  
528 ion mode electrospray ionization (ESI), RP/UPLC-MS/MS with negative ion mode ESI, and  
529 HILIC/UPLC-MS/MS with negative ion mode ESI. One fraction from each extract was reserved  
530 as a backup. All methods employed either an ACQUITY UPLC (Waters, Milford, MA, USA) or  
531 a Q-Exactive High Resolution/Accuracy Mass Spectrometer with a heated electrospray  
532 ionization (HESI-II) source and an Orbitrap Mass Analyzer (ThermoFisher, Waltham, MA,  
533 USA). A detailed description of methods and procedure for data acquisition, metabolite  
534 acquisition, quantitation, and data analysis can be found in Supplemental File 2.

535

536 **Growth curve assay**

537 A growth curve assay was performed for the isolates used for metabolomics analysis under  
538 H<sub>2</sub>O<sub>2</sub>-derived stress using a microtiter plate method as described by Meletiadiis et al. (2001).  
539 Both isolates were cultured on V8 agar for 7 days at 30°C in the dark. Agar plugs were collected  
540 along the growing edge of the colonies and placed into amber bottles containing ~5.0 mL 0.1%  
541 (v/v) Tween 20 and gently shaken to suspend conidia. The concentration of each conidial  
542 suspension was measured using a hemocytometer, and used to prepare inoculum for each isolate  
543 with at two concentrations of 2.0 x 10<sup>4</sup> conidia/mL as described by Meletiadiis et al. (2001) and  
544 8.0 x 10<sup>4</sup> conidia/mL as used for the present metabolomics assay. A 96-well flat bottom  
545 microtiter plate was then prepared by filling each well with 100 µL of double strength YES  
546 medium (4% yeast extract, 2% sucrose) amended with 0, 20, 30, 40, 50, or 60 mM H<sub>2</sub>O<sub>2</sub>. For  
547 each inoculum, 100 µL was added to each the prepared wells resulting in a standard YES  
548 concentration and a final concentration of 0, 10, 15, 20, 25, or 30 mM H<sub>2</sub>O<sub>2</sub>. Three replicate  
549 wells were inoculated for each isolate and treatment combination. For non-inoculated wells, 100  
550 µL of 0.1% Tween 20 was added in place of inoculum. The plate was sealed with optically-clear  
551 tape and incubated at 30°C in the dark without shaking in a Synergy HT plate reader (Biotek,  
552 Winooski, VT, USA). Optical density at 405 nm (OD<sub>405</sub>) was recorded every 15 min for 100 hr.  
553 The average of the OD<sub>405</sub> for the non-inoculated wells was then subtracted from each  
554 measurement to remove background absorbance.

555

556 **Data analysis**



557 Raw data obtained from UPLC-MS/MS analyses were peak-identified and QC corrected based  
558 on the Metabolon Laboratory Information Management System (LIMS) which contains  
559 identifying information for >4500 standard compounds. Quantitation and differential  
560 accumulation analyses were performed as described by Lawton et al. (2008), Lin et al. (2017),  
561 and Rao et al. (2014) using ArrayStudio and R (v3.4.0). Heatmaps and principal components  
562 analyses were performed using MultiExperiment Viewer (MeV, v4.9.0). Functional enrichment  
563 analyses were performed with Blast2GO (Conesa et al. 2005), and metabolic pathways were  
564 identified based on the KEGG database (Kanehisa and Goto, 2000). Pearson correlation analyses  
565 of the detected metabolites was performed using R (v3.4.0) and RStudio (v1.1.423). For the  
566 growth curve analysis, Gen3 software (Biotek) was then used to calculate the highest OD  
567 ( $OD_{max}$ ), and average time of initial detection at a defined threshold of  $OD_{405} = 0.2$  ( $T_i$ ).

568

## 569 **Acknowledgements**

570 We would like to thank Billy Wilson and Hui Wang for technical assistance in the laboratory.  
571 This work is partially supported by the U.S. Department of Agriculture Agricultural Research  
572 Service (USDA-ARS), USDA National Institute for Food and Agriculture (USDA-NIFA), the  
573 Georgia Agricultural Commodity Commission for Corn, the National Corn Growers Association  
574 Aflatoxin Mitigation Center of Excellence (AMCOE), the Georgia Peanut Commission, and The  
575 Peanut Foundation. Mention of trade names or commercial products in this publication is solely  
576 for the purpose of providing specific information and does not imply recommendation or  
577 endorsement by the USDA. The USDA is an equal opportunity employer and provider.

578

## 579 **Author Contributions**

580 JCF performed the culture experiments and data analyses, and wrote the manuscript. LY, MKP,  
581 and PB assisted in data analysis and in project discussions. DA performed the metabolomics  
582 experiment and assisted in data analysis. SC, RCK, and RKV contributed to project discussions  
583 and assisted with revision of the manuscript. BG conceived the project, planned, secured  
584 extramural funds, and revised and submitted manuscript.

585

## 586 **Conflict of Interest**

587 The authors declare no conflict of interests.

588

## 589 **References**

- 590 1. Achuo EA, Prinsen E, Höfte M. Influence of drought, salt stress and abscisic acid on the  
591 resistance of tomato to *Botrytis cinerea* and *Oidium neolycopersici*. *Plant Pathol.*  
592 2006;55: 178-186.
- 593 2. Ramegowda V, Senthil-Kumar M. The interactive effects of simultaneous biotic and  
594 abiotic stresses on plants: mechanistic understanding from drought and pathogen  
595 combination. *J. Plant Physiol.* 2015;176: 47-54.
- 596 3. Lecompte F, Nicot PC, Ripoll J, Abro MA, Raimbault AK, Lopez-Lauri F, Bertin N.  
597 Reduced susceptibility of tomato stem to the necrotrophic fungus *Botrytis cinerea* is  
598 associated with a specific adjustment of fructose content in the host sugar pool. *Ann. Bot.*  
599 2017;119: 931-943.
- 600 4. Schimel J, Balsler TC, Wallenstein M. Microbial stress-response physiology and its  
601 implications for ecosystem function. *Ecology.* 2007;88: 1386-1394.
- 602 5. Albright JC, Henke MT, Soukup AA, McClure RA, Thomson RJ, Keller NP, Kelleher  
603 NL. Large-scale metabolomics reveals a complex response of *Aspergillus nidulans* to  
604 epigenetic perturbation. *ACS Chem. Biol.* 2015; 10: 1535-1541.
- 605 6. Bertrand S, Bohni N, Schnee S, Schumpp O, Gindro K, Wolfender JL. Metabolite  
606 induction via microorganism co-culture: a potential way to enhance chemical diversity  
607 for drug discovery. *Biotechnol. Adv.* 2014;32: 1180-1204.
- 608 7. Brakhage, AA. Regulation of fungal secondary metabolism. *Nat. Rev. Microbiol.*  
609 2013;11: 21-32.
- 610 8. Scherlach K, Hertweck C. Triggering cryptic natural product biosynthesis in  
611 microorganisms. *Org. Biomol. Chem.* 2009;7: 1753-1760.
- 612 9. Amare MG, Keller NP. Molecular mechanisms of *Aspergillus flavus* secondary  
613 metabolism and development. *Fungal Genet. Biol.* 2014;66: 11-18.
- 614 10. Calvo AM, Wilson RA, Bok JW, Keller NP. Relationship between secondary metabolism  
615 and fungal development. *Microbiol. Mol. Biol. Rev.* 2002;66: 447-459.

- 616 11. López JC, Pérez JS, Sevilla JF, Fernández FA, Grima EM, Chisti Y. Production of  
617 lovastatin by *Aspergillus terreus*: effects of the C: N ratio and the principal nutrients on  
618 growth and metabolite production. *Enzyme Microb. Technol.* 2003;33: 270-277.
- 619 12. Mitchell NJ, Bowers E, Hurburgh C, Wu F. Potential economic losses to the US corn  
620 industry from aflatoxin contamination. *Food Addit. Contam. Part A.* 2016;33: 540-550.
- 621 13. Hill RA, Blankenship PD, Cole RJ, Sanders TH. Effects of soil moisture and temperature  
622 on preharvest invasion of peanuts by the *Aspergillus flavus* group and subsequent  
623 aflatoxin development. *Appl. Environ. Microbiol.* 1983;45: 628-633.
- 624 14. Scully BT, Krakowsky MD, Ni X, Wilson JP, Lee RD, Guo B. Preharvest aflatoxin  
625 contamination of corn and other grain crops grown on the US Southeastern Coastal Plain.  
626 *Toxin Rev.* 2009;28: 169-179.
- 627 15. Fountain JC, Scully BT, Chen ZY, Gold SE, Glenn AE, Abbas HK, Lee RD, Kemerait  
628 RC, Guo B. Effects of hydrogen peroxide on different toxigenic and atoxigenic isolates  
629 of *Aspergillus flavus*. *Toxins.* 2015;7: 2985-2999.
- 630 16. Yan S, Liang Y, Zhang J, Liu CM. *Aspergillus flavus* grown in peptone as the carbon  
631 source exhibits spore density-and peptone concentration-dependent aflatoxin  
632 biosynthesis. *BMC Microbiol.* 2012;12: 106. DOI: [doi.org/10.1186/1471-2180-12-106](https://doi.org/10.1186/1471-2180-12-106)
- 633 17. Xue HQ, Isleib TG, Payne GA, Wilson RF, Novitzky WP, O'Brian G. Comparison of  
634 aflatoxin production in normal-and high-oleic backcross-derived peanut lines. *Plant Dis.*  
635 2003;87: 1360-1365.
- 636 18. Zeringue HJ, Brown RL, Neucere JN, Cleveland TE. Relationships between C6– C12  
637 alkanal and alkenal volatile contents and resistance of maize genotypes to *Aspergillus*  
638 *flavus* and aflatoxin production. *J. Ag. Food Chem.* 1996;44: 403-407.
- 639 19. Burow GB, Nesbitt TC, Dunlap J, Keller NP. Seed lipoxygenase products modulate  
640 *Aspergillus* mycotoxin biosynthesis. *Mol. Plant Microbe Interact.* 1997;10: 380-387.
- 641 20. Gao X, Brodhagen M, Isakeit T, Brown SH, Göbel C, Betran J, Feussner I, Keller NP,  
642 Kolomiets MV. Inactivation of the lipoxygenase ZmLOX3 increases susceptibility of  
643 maize to *Aspergillus spp.* *Mol. Plant Microbe Interact.* 2009;22: 222-231.
- 644 21. Yang L, Fountain JC, Ji P, Ni X, Chen S, Lee RD, Kemerait RC, Guo B. Deciphering  
645 drought-induced metabolic responses and regulation in developing maize kernels. *Plant*  
646 *biotechnology journal.* 2018. DOI: [doi: 10.1111/pbi.12899](https://doi.org/10.1111/pbi.12899).
- 647 22. Tsitsigiannis DI, Keller NP. Oxylipins as developmental and host–fungal communication  
648 signals. *Trends Microbiol.* 2007;15: 109-118.
- 649 23. Grintzalis K, Vernardis SI, Klapa MI, Georgiou CD. The role of oxidative stress in  
650 sclerotial differentiation and aflatoxin B1 biosynthesis in *Aspergillus flavus*. *Appl.*  
651 *Environ. Microbiol.* 2014; 80: 5561-5571.
- 652 24. Jayashree T, Subramanyam C. Oxidative stress as a prerequisite for aflatoxin production  
653 by *Aspergillus parasiticus*. *Free Radic. Biol. Med.* 2000;29: 981-985.
- 654 25. Narasaiah KV, Sashidhar RB, Subramanyam C. Biochemical analysis of oxidative stress  
655 in the production of aflatoxin and its precursor intermediates. *Mycopathologia.* 2006;162:  
656 179-189.
- 657 26. Yin WB, Reinke AW, Szilagyi M, Emri T, Chiang YM, Keating AE, Pocsi I, Wang CC,  
658 Keller NP. bZIP transcription factors affecting secondary metabolism, sexual  
659 development and stress responses in *Aspergillus nidulans*. *Microbiol.* 2013;159: 77-88.

- 660 27. Roze LV, Laivenieks M, Hong SY, Wee J, Wong SS, Vanos B, Awad D, Ehrlich KC,  
661 Linz JE. Aflatoxin biosynthesis is a novel source of reactive oxygen species—a potential  
662 redox signal to initiate resistance to oxidative stress? *Toxins*. 2015;7: 1411-1430.
- 663 28. Roze LV, Chanda A, Wee J, Awad D, Linz JE. Stress-related transcription factor atfB  
664 integrates secondary metabolism with the oxidative stress response in *Aspergilli*. *J. Biol.*  
665 *Chem.* 2011;286: 35137-35148.
- 666 29. Soboń A, Szewczyk R, Różalska S, Długoński J. Metabolomics of the recovery of the  
667 filamentous fungus *Cunninghamella echinulata* exposed to tributyltin. *Int. Biodeterior.*  
668 *Biodegradation.* 2018;127: 130-138.
- 669 30. Xu Q, Fu Y, Li S, Jiang L, Rongfeng G, Huang H. Integrated transcriptomic and  
670 metabolomic analysis of *Rhizopus oryzae* with different morphologies. *Process Biochem.*  
671 2018;64: 74-82.
- 672 31. Zheng H, Kim J, Liew M, Yan JK, Herrera O, Bok JW, Kelleher NL, Keller NP, Wang  
673 Y. Redox metabolites signal polymicrobial biofilm development via the NapA oxidative  
674 stress cascade in *Aspergillus*. *Curr. Biol.* 2015;25: 29-37.
- 675 32. Fountain JC, Bajaj P, Nayak SN, Yang L, Pandey MK, Kumar V, Jayale AS, Chitikineni  
676 A, Lee RD, Kemerait RC, Varshney RK. Responses of *Aspergillus flavus* to oxidative  
677 stress are related to fungal development regulator, antioxidant enzyme, and secondary  
678 metabolite biosynthetic gene expression. *Front. Microbiol.* 2016a;7: 2048. DOI:  
679 10.3389/fmicb.2016.02048
- 680 33. Fountain JC, Bajaj P, Pandey M, Nayak SN, Yang L, Kumar V, Jayale AS, Chitikineni  
681 A, Zhuang W, Scully BT, Lee RD. Oxidative stress and carbon metabolism influence  
682 *Aspergillus flavus* transcriptome composition and secondary metabolite production. *Sci.*  
683 *Rep.* 2016b;6: 38747. DOI: 10.1038/srep38747
- 684 34. Fountain JC, Koh J, Yang L, Pandey MK, Nayak SN, Bajaj P, Zhuang WJ, Chen ZY,  
685 Kemerait RC, Lee RD, Chen S. Proteome analysis of *Aspergillus flavus* isolate-specific  
686 responses to oxidative stress in relationship to aflatoxin production capability. *Sci. Rep.*  
687 2018;8: 3430. DOI: 10.1038/s41598-018-21653-x
- 688 35. Mehl HL, Cotty PJ. Variation in competitive ability among isolates of *Aspergillus flavus*  
689 from different vegetative compatibility groups during maize infection. *Phytopathology.*  
690 2010;100: 150-159.
- 691 36. Mehl HL, Cotty PJ. Influence of plant host species on intraspecific competition during  
692 infection by *Aspergillus flavus*. *Plant Pathol.* 2013;62: 1310-1318.
- 693 37. Cotty PJ. Virulence and cultural characteristics of two *Aspergillus flavus* strains  
694 pathogenic on cotton. *Phytopathology.* 1989;79: 808-814.
- 695 38. Ehrlich KC, Montalbano BG, Cotty PJ. Analysis of single nucleotide polymorphisms in  
696 three genes shows evidence for genetic isolation of certain *Aspergillus flavus* vegetative  
697 compatibility groups. *FEMS Microbiol. Lett.* 2007;268: 231-236.
- 698 39. Chang PK, Abbas HK, Weaver MA, Ehrlich KC, Scharfenstein LL, Cotty PJ.  
699 Identification of genetic defects in the atoxigenic biocontrol strain *Aspergillus flavus* K49  
700 reveals the presence of a competitive recombinant group in field populations. *Int. J. Food*  
701 *Microbiol.* 2012;154: 192-196.
- 702 40. Kanehisa M, Goto S. KEGG: Kyoto encyclopedia of genes and genomes. *Nucleic Acids*  
703 *Res.* 2000;28: 27-30.

- 704 41. Roze LV, Laivenieks M, Hong SY, Wee J, Wong SS, Vanos B, Awad D, Ehrlich KC,  
705 Linz JE. Aflatoxin biosynthesis is a novel source of reactive oxygen species—a potential  
706 redox signal to initiate resistance to oxidative stress? *Toxins*. 2015;7: 1411-1430.
- 707 42. Meletiadiis J, Meis JF, Mouton JW, Verweij PE. Analysis of growth characteristics of  
708 filamentous fungi in different nutrient media. *J. Clin. Microbiol.* 2001;39: 478-484.
- 709 43. Clevström G, Ljunggren H, Tegelström S, Tideman K. Production of aflatoxin by an  
710 *Aspergillus flavus* isolate cultured under a limited oxygen supply. *Appl. Environ.*  
711 *Microbiol.* 1983;46: 400-405.
- 712 44. Sawa K, Uematsu T, Korenaga Y, Hirasawa R, Kikuchi M, Murata K, Zhang J, Gai X,  
713 Sakamoto K, Koyama T, Satoh T. Krebs cycle intermediates protective against oxidative  
714 stress by modulating the level of reactive oxygen species in neuronal ht22 cells.  
715 *Antioxidants*. 2017;6: 21. DOI: 10.3390/antiox6010021.
- 716 45. Dijkema C, Kester, HCM, Visser J. <sup>13</sup>C NMR studies of carbon metabolism in the  
717 hyphal fungus *Aspergillus nidulans*. *Proc. Natl. Acad. Sci. USA*. 1985;82: 14-18.
- 718 46. Lima PS, Casaletti L, Bailao AM, Vasconcelos ATR, Fernandes GR, Soares CMA.  
719 Transcriptional and proteomic responses to carbon starvation in Paracoccidioides. *PLoS*  
720 *Negl. Trop. Dis.* 2014;8: e2855. DOI: 10.1371/journal.pntd.0002855
- 721 47. Kapoor D, Sharma R, Handa N, Kaur H, Rattan A, Yadav P, Gautam V, Kaur R,  
722 Bhardwaj R. Redox homeostasis in plants under abiotic stress: role of electron carriers,  
723 energy metabolism mediators and proteinaceous thiols. *Front. Environ. Sci.* 2015;3: 13.  
724 DOI: 10.3389/fenvs.2015.00013
- 725 48. Campbell K, Vowinckel J, Keller MA, Ralser M. Methionine metabolism alters oxidative  
726 stress resistance via the pentose phosphate pathway. *Antioxid. Redox Signal.* 2016;24:  
727 543-547.
- 728 49. Juhnke H, Krems B, Kötter P, Entian KD. Mutants that show increased sensitivity to  
729 hydrogen peroxide reveal an important role for the pentose phosphate pathway in  
730 protection of yeast against oxidative stress. *Mol. Gen. Genet.* 1996;252: 456-464.
- 731 50. Huang JQ, Jiang HF, Zhou YQ, Lei Y, Wang SY, Liao BS. Ethylene inhibited aflatoxin  
732 biosynthesis is due to oxidative stress alleviation and related to glutathione redox state  
733 changes in *Aspergillus flavus*. *Int. J. Food Microbiol.* 2009;130:17-21.
- 734 51. Kletzien RF, Harris PK, Foellmi LA. Glucose-6-phosphate dehydrogenase: a  
735 "housekeeping" enzyme subject to tissue-specific regulation by hormones, nutrients, and  
736 oxidant stress. *FASEB J.* 1994;8: 174-181.
- 737 52. Shih CN, Marth EH. Aflatoxin formation, lipid synthesis, and glucose metabolism by  
738 *Aspergillus parasiticus* during incubation with and without agitation. *Biochim. Biophys.*  
739 *Acta Gen. Subj.* 1974;338: 286-296.
- 740 53. Chen C, Dickman MB. Proline suppresses apoptosis in the fungal pathogen  
741 *Colletotrichum trifolii*. *Proc. Natl. Acad. Sci. USA*. 2005;102: 3459-3464.
- 742 54. Szabados L, Savoure A. Proline: a multifunctional amino acid. *Trends Plant Sci.* 2010;15:  
743 89-97.
- 744 55. Zhang K, Yuan X, Zang J, Wang M, Zhao F, Li P, Cao J, Han J, Xing J, Dong J. The  
745 kynurenine 3-monooxygenase encoding gene, BcKMO, is involved in the growth,  
746 development, and pathogenicity of *Botrytis cinerea*. *Front. Microbiol.* 2018;9: 1039.  
747 DOI: 10.3389/fmicb.2018.01039.



- 748 56. Breitenbach M, Weber M, Rinnerthaler M, Karl T, Breitenbach-Koller L. Oxidative  
749 stress in fungi: its function in signal transduction, interaction with plant hosts, and  
750 lignocellulose degradation. *Biomolecules*. 2015;5: 318-342.
- 751 57. Thön M, Al-Abdallah Q, Hortschansky P, Brakhage AA. The thioredoxin system of the  
752 filamentous fungus *Aspergillus nidulans* impact on development and oxidative stress  
753 response. *J. Biol. Chem.* 2007;282: 27259-27269.
- 754 58. Horn BW. Biodiversity of *Aspergillus* section Flavi in the United States: a review. *Food*  
755 *Addit. Contam.* 2007;24: 1088-1101.
- 756 59. Jong CJ, Azuma J, Schaffer S. Mechanism underlying the antioxidant activity of taurine:  
757 prevention of mitochondrial oxidant production. *Amino Acids*. 2012;42: 2223-2232.
- 758 60. Valdés-Santiago L, Ruiz-Herrera J. Stress and polyamine metabolism in fungi. *Front.*  
759 *Chem.* 2014;1: 42. DOI: 10.3389/fchem.2013.00042.
- 760 61. Avila MA, Garcia-Trevijano ER, Lu SC, Corrales FJ, Mato JM. Methylthioadenosine.  
761 *Int. J. Biochem. Cell Biol.* 2004;36: 2125-2130.
- 762 62. Fanelli C, Fabbri AA. Relationship between lipids and aflatoxin biosynthesis.  
763 *Mycopathologia*. 1989;107: 115-120.
- 764 63. Calvo AM, Hinze LL, Gardner HW, Keller NP. Sporogenic effect of polyunsaturated  
765 fatty acids on development of *Aspergillus spp.* *Appl. Environ. Microbiol.* 1999;65: 3668-  
766 3673.
- 767 64. Affeldt KJ, Brodhagen M, Keller NP. *Aspergillus* oxylipin signaling and quorum sensing  
768 pathways depend on G protein-coupled receptors. *Toxins*. 2012;4: 695-717.
- 769 65. Fischer GJ, Keller NP. Production of cross-kingdom oxylipins by pathogenic fungi: An  
770 update on their role in development and pathogenicity. *J. Microbiol.* 2016;54: 254-264.
- 771 66. Rodríguez-Vargas S, Sánchez-García A, Martínez-Rivas JM, Prieto JA, Rande-Gil F.  
772 Fluidization of membrane lipids enhances the tolerance of *Saccharomyces cerevisiae* to  
773 freezing and salt stress. *Appl. Environ. Microbiol.* 2007;73: 110-116.
- 774 67. Yasmin S, Alcazar-Fuoli L, Gründlinger M, Puempel T, Cairns T, Blatzer M, Lopez JF,  
775 Grimalt JO, Bignell E, Haas H. Mevalonate governs interdependency of ergosterol and  
776 siderophore biosyntheses in the fungal pathogen *Aspergillus fumigatus*. *Proc. Natl Acad.*  
777 *Sci. USA.* 2012;109: 497-504.
- 778 68. Singh D, Lee S, Lee CH. Fathoming *Aspergillus oryzae* metabolomes in formulated  
779 growth matrices. *Crit. Rev. Biotechnol.* 2018. DOI: 10.1080/07388551.2018.1490246.
- 780 69. Fountain J, Scully B, Ni X, Kemerait R, Lee D, Chen ZY, Guo B. Environmental  
781 influences on maize-*Aspergillus flavus* interactions and aflatoxin production. *Front.*  
782 *Microbiol.* 2014;5: 40. DOI: 10.3389/fmicb.2014.00040.
- 783 70. Fernandez O, Urrutia M, Bernillon S, Giauffret C, Tardieu F, Le Gouis J, Langlade N,  
784 Charcosset A, Moing A, Gibon Y. Fortune telling: metabolic markers of plant  
785 performance. *Metabolomics*. 2016;12: 158. DOI: 10.1007/s11306-016-1099-1.
- 786 71. Lin Z, Zhang X, Wang Z, Jiang Y, Liu Z, Alexander D, Li G, Wang S, Ding Y.  
787 Metabolomic analysis of pathways related to rice grain chalkiness by a notched-belly  
788 mutant with high occurrence of white-belly grains. *BMC Plant Biol.* 2017;17: 39. DOI:  
789 10.1186/s12870-017-0985-7
- 790 72. Lawton KA, Berger A, Mitchell M, Milgram KE, Evans AM, Guo L, Hanson RW,  
791 Kalhan SC, Ryals JA, Milburn MV. Analysis of the adult human plasma metabolome.  
792 *Pharmacogenomics*. 2008;9: 383-397.

- 793 73. Rao J, Cheng F, Hu C, Quan S, Lin H, Wang J, Chen G, Zhao X, Alexander D, Guo L,  
794 Wang G. Metabolic map of mature maize kernels. *Metabolomics*. 2014;10: 775-787.  
795 74. Conesa A, Götz S, García-Gómez JM, Terol J, Talón M, Robles M. Blast2GO: a  
796 universal tool for annotation, visualization and analysis in functional genomics research.  
797 *Bioinformatics*. 2005;21: 3674-3676.  
798  
799  
800  
801

802 **Figure Legends**

803 **Figure 1.** Growth curve analysis of *Aspergillus flavus* isolates AF13 and NRRL3357 under  
804 increasing oxidative stress and conidial concentration. The growth of AF13 (A, C) and  
805 NRRL3357 (B, D) were examined under increasing H<sub>2</sub>O<sub>2</sub> concentrations in YES medium  
806 inoculated with either 2.0 x 10<sup>4</sup> (A, B) or 8.0 x 10<sup>4</sup> conidia/mL (C, D) by monitoring absorbance  
807 at 405 nm over 100 hours. A threshold of 0.2 was selected for growth initiation timing which  
808 corresponded with linear phase initiation for both isolates in most conditions and is indicated by  
809 the dashed red line. Error bars represent standard deviation. No growth was detected at H<sub>2</sub>O<sub>2</sub>  
810 concentrations >15mM in NRRL3357 with earlier growth initiation detected at higher conidia  
811 concentrations.

812

813 **Figure 2.** Principal components analysis (PCA) of metabolite accumulation. A4N, A4Y, A7N,  
814 and A7Y refer to AF13 at 4 and 7 DAI with and without 15mM H<sub>2</sub>O<sub>2</sub> treatment. N4N, N4Y,  
815 N7N, and N7Y refer to the same for NRRL3357. Dark blue points correspond with AF13 with  
816 no stress and light blue points refer to AF13 with stress. Orange points correspond with  
817 NRRL3357 with no stress and light orange points refer to NRRL3357 with stress. Circles  
818 represent samples at 4 DAI and triangles represent samples at 7 DAI.

819

820 **Figure 3.** Differential accumulation of compounds involved in carbohydrate metabolism,  
821 glutathione metabolism, and amino acid biosynthesis. Heatmaps located at each metabolite  
822 represent the changes in metabolite accumulation in response to oxidative stress in AF13 and  
823 NRRL3357 at 4 and 7 DAI. Red and green indicate significant increases and decreases in  
824 metabolite levels, respectively ( $p < 0.05$ ). Light red and light green indicate marginally



825 significant increases and decreases in metabolite levels, respectively ( $0.05 < p < 0.10$ ). Grey  
826 represents no significant changes.

827

828 **Figure 4.** Differential accumulation of compounds involved in polyamine and sulfur  
829 metabolism. Heatmaps located at each metabolite represent the changes in metabolite  
830 accumulation in response to oxidative stress in AF13 and NRRL3357 at 4 and 7 DAI. Red and  
831 green indicate significant increases and decreases in metabolite levels, respectively ( $p < 0.05$ ).  
832 Light red and light green indicate marginally significant increases and decreases in metabolite  
833 levels, respectively ( $0.05 < p < 0.10$ ). Grey represents no significant changes.

834

835 **Figure 5.** Differential accumulation of compounds involved in lipid metabolism. Heatmaps  
836 located at each metabolite represent the changes in metabolite accumulation in response to  
837 oxidative stress in AF13 and NRRL3357 at 4 and 7 DAI. Red and green indicate significant  
838 increases and decreases in metabolite levels, respectively ( $p < 0.05$ ). Light red and light green  
839 indicate marginally significant increases and decreases in metabolite levels, respectively ( $0.05 <$   
840  $p < 0.10$ ). Grey represents no significant changes.

841

842

843 **Supplemental Figure Legends**

844

845 **Figure S1.** Metabolomics experiment design. Two isolates of *Aspergillus flavus*, AF13 (highly  
846 aflatoxigenic and oxidative stress tolerant) and NRRL3357 (moderate to highly aflatoxigenic and  
847 moderately oxidative stress tolerant), were grown in yeast extract sucrose (YES) medium  
848 supplemented with either 0 or 15 mM H<sub>2</sub>O<sub>2</sub>. Samples were collected at 4 and 7 days after  
849 inoculation (DAI). Five biological replicates (n = 5, N = 40) were performed for each isolate,  
850 treatment, and time point combination. Statistical comparisons are indicated by the colored  
851 arrows with blue indicating oxidative stress effect comparisons, red indicating time effects, and  
852 green indicating isolate/genotype effects.

853

854

855

856

857

858

859

860

861 **Tables**

**Table 1.** Numbers of significantly, differentially accumulating metabolites.

| <b>Effects</b> | <b>Comparison</b> | <b>Total Sig. Met.</b> | <b>Sig. Increased</b> | <b>Sig. Decreased</b> |
|----------------|-------------------|------------------------|-----------------------|-----------------------|
| Time           | A7N / A4N         | 257                    | 58                    | 199                   |
|                | A7Y / A4Y         | 268                    | 108                   | 160                   |
|                | N7N / N4N         | 243                    | 51                    | 192                   |
|                | N7Y / N4Y         | 261                    | 118                   | 143                   |
| Stress         | A4Y / A4N         | 111                    | 27                    | 84                    |
|                | A7Y / A7N         | 47                     | 34                    | 13                    |
|                | N4Y / N4N         | 223                    | 90                    | 133                   |
|                | N7Y / N7N         | 90                     | 65                    | 25                    |
| Isolate        | A4N / N4N         | 143                    | 95                    | 48                    |
|                | A7N / N7N         | 97                     | 50                    | 47                    |
|                | A4Y / N4Y         | 220                    | 128                   | 92                    |
|                | A7Y / N7Y         | 96                     | 42                    | 54                    |

Comparison nomenclature: AF13 (A), NRRL3357 (N), DAI (4 and 7), without H<sub>2</sub>O<sub>2</sub> (N), and with H<sub>2</sub>O<sub>2</sub> (Y).

862

863

864

865

866

867

868

869

870

871

872

873

874

875

876 **Figures**

877 **Figure 1**

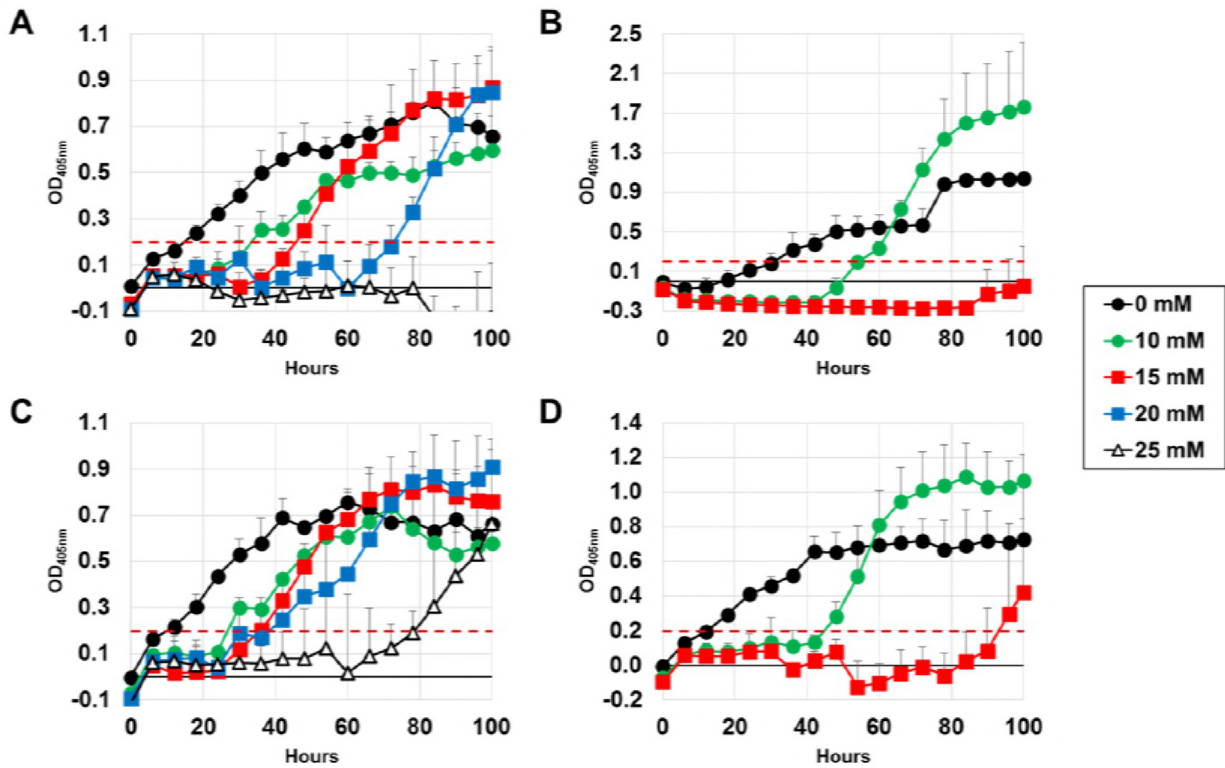

878

879

880

881

882

883

884

885

886

887

888

889 **Figure 2**

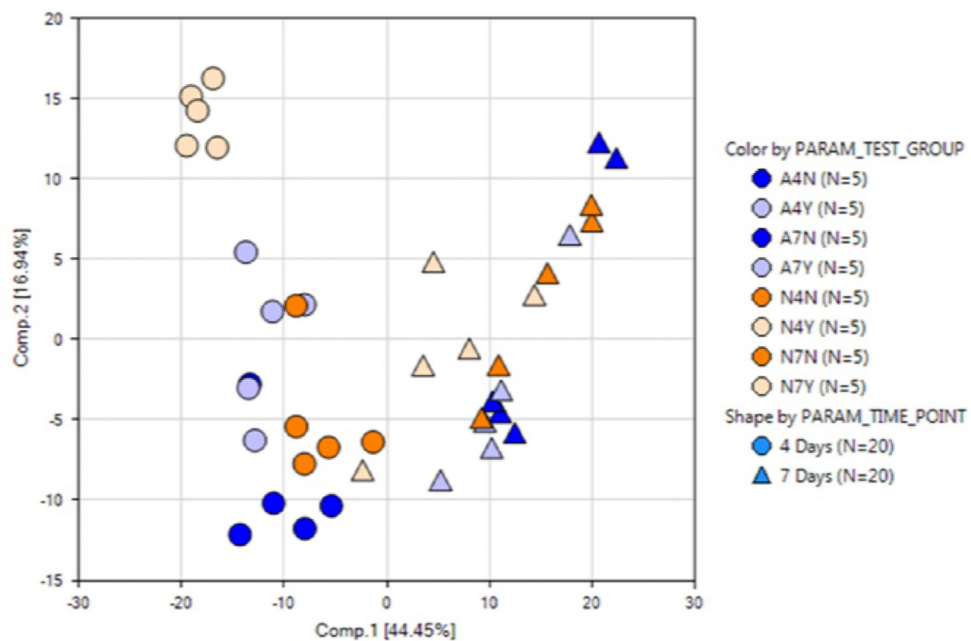

890

891

892

893

894

895

896

897

898

899

900

901

902

903

904 **Figure 3**

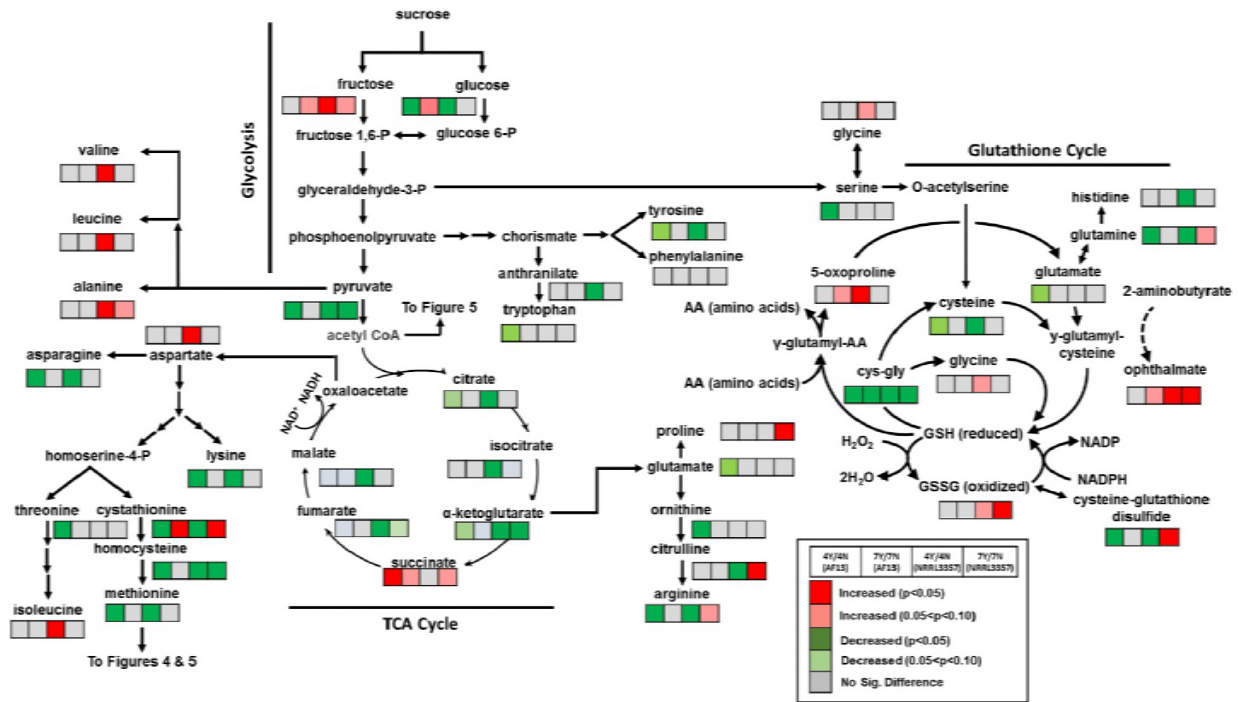

905

906

907

908

909

910

911

912

913

914

915

916

917

918 **Figure 4**

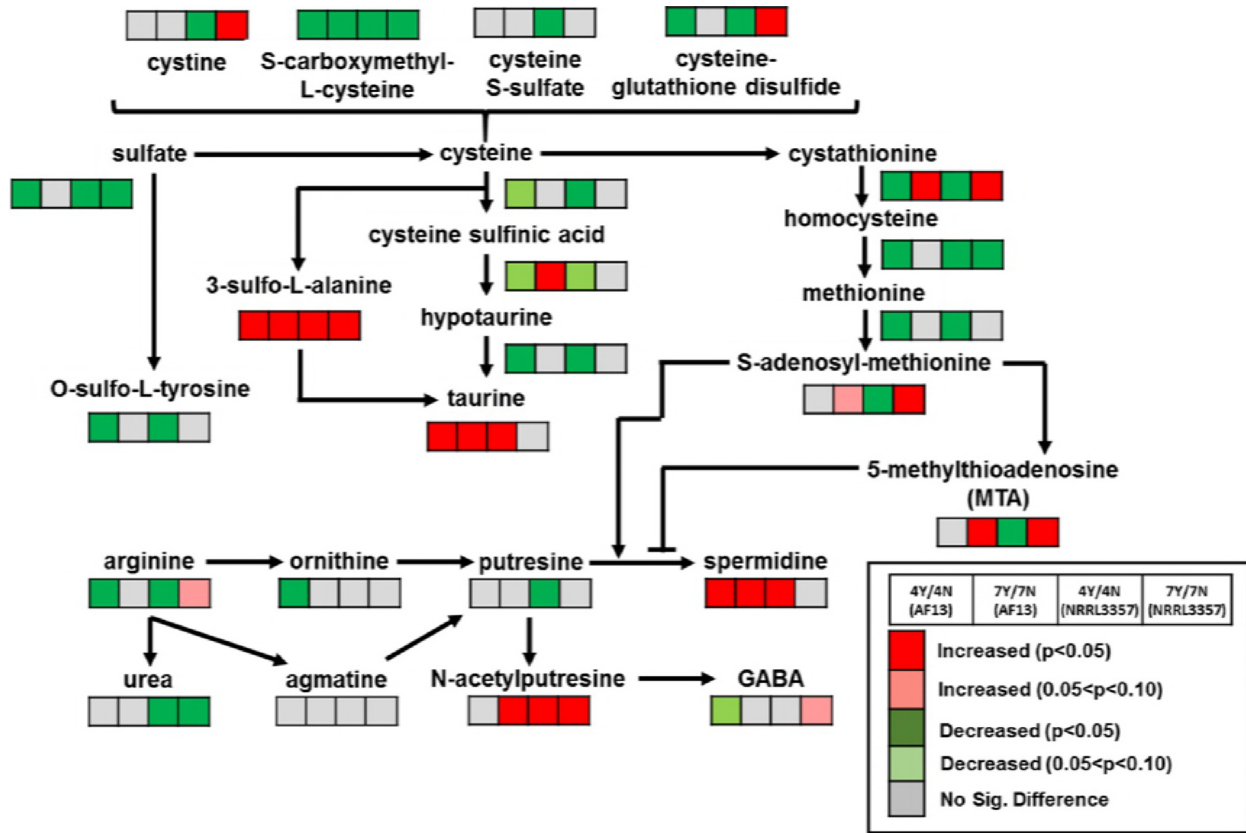

919

920

921

922

923

924

925

926

927

928

929

930

931 **Figure 5**

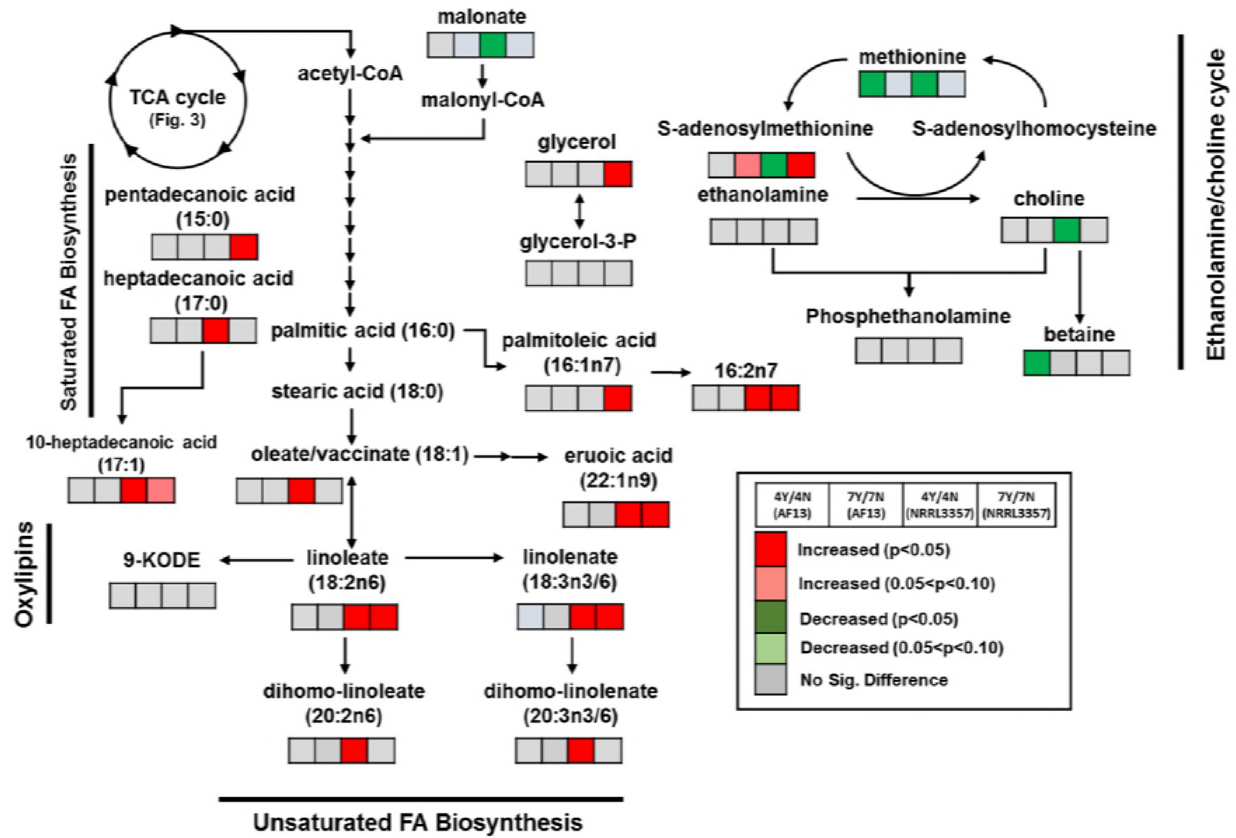

932

933

934

935

936
